# Supplementary material for: Identification of a RAI1-associated disease network through integration of exome sequencing, transcriptomics, and 3D genomics
Source: Genome Med. 2016 Nov 1;8:105. doi: 10.1186/s13073-016-0359-z (PMC5088687; doi:10.1186/s13073-016-0359-z)
Supplement: Additional file 2: — Fourteen supporting tables. A table caption of each is given within the file. (XLSX 1540 kb) [file 13073_2016_359_MOESM2_ESM.xlsx]

## Sheet: Table S1new
Supplementary Table S1: Clinical phenotype of SMS patients without RAI1 alteration compared with classical SMS phenotype
Identifier		SMS (classical)	BAB1604	BAB1952	BAB2134	BAB2293	BAB2310	BAB2321	BAB2330	BAB2386	BAB2451	BAB2474	BAB2492	BAB2540	BAB2552	BAB2559	BAB4947	# affected / # reported
Sex	sex		F	M	M	M	M	M	F	F	F	F	M	F	F	M	M	N/A
Ethnicity	origin		Anglo-Saxon	NR	NR	NR	no data	NR	Caucasian	no data	NR	NR	NR	NR	NR	Caucasian	Turkish	N/A
Age at exam	age		3 y 2 m	13 y	11 y	2 y 3 m		12 y 2 m	5 y 8 m		10 y 3 m	5 y	3 y	17 y	5 y	8 y	NR	N/A
Infancy	birthweight	AGA	AGA	NR	AGA	NR		NR	AGA		AGA	AGA	AGA	NR	NR	NR	NR	N/A
	feeding difficulties	+	-	+	NR	+		NR	-		-	+	-	NR	NR	NR	NR	3/7
	failure to thrive	+	-	NR	-	NR		NR	+		-	+	-	NR	NR	NR	NR	2/6
	hypotonia	+	+	+	NR	NR		NR	+		NR	+	-	NR	NR	+	NR	5/6
	hyporeflexia	+	+	NR	NR	NR		-	-		NR	-	-	NR	NR	+	NR	2/6
Behavior	sleep disturbance	+	-	+	+	+		-	+		narcolepsy	NR	+	NR	+	NR	+	8/10
	stereotypies	+	+	NR	+	+		-	+		NR	NR	-	+	NR	NR	+	6/8
	self-injurious behaviors	+	+	+	+	+		NR	+		+	NR	-	+	+	+	+	10/11
	polyembolokoilamania	+	NR	NR	-	NR		NR	+		NR	NR	-	+	NR	NR	+	3/5
	onychotillomania	+	NR	+	+	NR		+	NR		+	NR	-	NR	NR	+	+	6/7
	aggression or hyperactivity	+	-	+	+	+		-	+		+	NR	-	+	+	+	+	9/12
Development	developmental delay	+	+	+	+	+		+	+		+	+	+	+	+	+	+	13/13
	speech delay	+	+	+	+	+		-	+		+	+	+	+	NR	+	NR	10/11
	cognitive impairment	+	+	+	+	+		+	+		+	+	+	+	NR	+	+	12/12
Seizures			NR	NR	NR	NR		NR	suspected		+	seizure-like activity, normal EEG	NR	NR	NR	NR	+	4/4
Physical features	broad square-shaped face	+	NR	+	-	NR		-	-		-	-	NR	NR	NR	NR	-	1/7
	brachycephaly	+	NR	NR	-	+		-	-		-	-	NR	NR	NR	NR	+	2/7
	prominent forehead	+	+	-	+	NR		-	+		-	-	NR	NR	NR	NR	NR	3/7
	synophrys	+	+	-	-	NR		-	-		-	-	-	NR	NR	NR	NR	1/8
	upslanting palpebral fissures	+	+	-	+	NR		-	+		-	+	-	NR	NR	NR	-	4/9
	deep set eyes	+	+	NR	-	NR		+	-		-	-	-	NR	+	NR	-	3/9
	broad nasal bridge	+	+	+	NR	NR		-	-		-	+	-	NR	NR	NR	-	3/8
	smooth philtrum	+	+	+	NR	NR		+	-		-	-	NR	NR	NR	NR	-	3/7
	midface hypoplasia	+	NR	+	NR	NR		-	+		-	-	NR	NR	NR	NR	-	2/6
	short, full-tipped nose	+	NR	+	-	NR		-	-		-	-	NR	NR	NR	NR	-	1/7
	micrognathia in infancy	+	NR	NR	+	NR		-	-		-	-	NR	NR	NR	NR	-	1/6
	relative prognathia with age	+	+	NR	-	NR		+	+		NR	-	NR	NR	NR	NR	-	3/6
	down-turned mouth	+	-	NR	NR	NR		+	-		+	+	-	NR	NR	NR	+	4/7
	low set ears	+	borderline	NR	-	NR		-	-		-	-	-	NR	NR	NR	-	1/8
Skeletal anomalies		+	NR	NR	NR	NR		pectus carinatum	slight metacarpal hypoplasia; slight joint laxity		scoliosis	proximal insertion of thumbs, externally rotated legs, valgus deformity in feet	brachydactyly	NR	NR	NR	brachydactyly	6/6
Ophthalmology		+/-	-	NR	NR	NR		decreased visual acuity	-		-	ocular motor apraxia	-	amblyopia	NR	NR	strabismus	4/8
Hearing loss		+/-	NR	NR	+	NR		-	-		normal tympanogram; central auditory processing disorder	NR	NR	-	NR	NR	NR	2/5
Peripheral neuropathy		+	+	NR	NR	NR		NR	-		-	NR	-	NR	NR	+	NR	2/5
Brain MRI		mild ventriculomegaly	-	mild increase in CSF spaces	NR	CT normal		NR	-		mild global volume loss	-	NR	NR	NR	mild thinning of corpus callosum; mild increase in CSF spaces	NR	3/7
Cardiac		+/-	NR	NR	NR	NR		-	NR		NR	NR	-	NR	NR	NR	NR	0/2
Renal		+/-	NR	bilateral UPJ obstruction	NR	NR		NR	NR		NR	structurally normal	-	NR	NR	NR	NR	2/3
Thyroid		+/-	-	NR	NR	-		NR	-		-	NR	-	NR	NR	NR	NR	0/5
Other								psoriasis	acquired microcephaly		macrocephaly, obesity, asthma	prematurity 33 wks, hypertension, asthma, central apnea					Kabuki-like face
Variant		RAI1 deletion or variant Chr17:17699140_C>T Chr17:17699365_C>CC Chr17:17701527_CC>C Chr17: _17699035 del29bp	N/A	N/A	N/A	KDM5C ChrX:53225150_T>C	KMT2D Chr12:49428698_C>A	CC2D1A Chr19:14034243_C>T Chr19:14040420_G>A	POGZ Chr1:151380626_CAGAG>C	ZEB2 Chr2:145147517_T>G	JAKMIP1 Chr4:6055827_C>G	MAP2K2 Chr19:4117507_GTCA>G	47,XYY; pathogenic SNV not detected	CASK ChrX:41437631_G>A	MECP2 ChrX:153296071_GGGGGGCTGGTGGGGTCCTCGGAGCTCTCGGGCTCAGGTGGAGGT>G	N/A	GLDC Chr9:6556178_A>T Chr9:6558671_G>A
Inheritance		de novo				unknown	de novo	Potential compound heterozygote	not maternally inherited (paternal DNA not available)	de novo	de novo	unknown	de novo	de novo	variant inherited from mother, who has skewed X-inactivation		Compound heterozygote
Abbreviations: AGA - appropriate for gestational age, CSF - cerebrospinal fluid, m - month, NR - not reported, UPJ - ureteropelvic junction; y - year; N/A - not applicable

## Sheet: Table S2new
Supplementary Table S2: Catalog of lymphoblastoid cell lines and 4C primers used in this study
Table S2.1
Sample code	Origin	Gender	Age	Copy Number of 17p11.2 RAI1 locus
GRAEM-control1	CIG, Lausanne	F	31	2
SOMAG-control2	CIG, Lausanne	F	28	2
Table S2.2
Viewpoint	Primer name	Sequence	Primer name	Sequence
RAI1	RAI1_4CadaptAAC_F	AATGATACGGCGACCACCGAACACTCTTTCCCTACACGACGCTCTTCCGATCTAACCGGATTCAGGGACCCACT	RAI1_4Cadapt_R	CAAGCAGAAGACGGCATACGAGTCCTGCCACCCCTTGTC
RAI1	RAI1_4CadaptGTG_F	AATGATACGGCGACCACCGAACACTCTTTCCCTACACGACGCTCTTCCGATCTGTGCGGATTCAGGGACCCACT	RAI1_4Cadapt_R	CAAGCAGAAGACGGCATACGAGTCCTGCCACCCCTTGTC
footnote: the Illumina adapter tails are highlighted in red (forward primers) and blue (reverse primers), while the barcode is highlighted in green.

## Sheet: Table S3new
Supplementary Table S3: Numbers of raw, excluded, mappable and mapped 4C reads for each viewpoint and sample
Viewpoint	Replicate	RawReads	ExcludedReads *reads that have been filtered, due to the presence of Undigested,Self−ligated and/or bait sequence	MappableReads *reads considered for the rest of the analysis (Bowtie)	MappedReads
RAI1	Replicate1	92689760	27535560	65154200	33870541
RAI1	Replicate2	79172839	20475887	58696952	22908507

## Sheet: Table S4new
Supplementary Table S4: Comparison of typical SMS, MOWS, MICPCH, KABUK1, GCE, MRXS13, CFC4 and MRXSC phenotypes
		Smith-Magenis syndrome [MIM# 182290]	Mowat-Wilson syndrome [MIM# 235730]	MICPCH [MIM# 300749]	Kabuki syndrome-1 [MIM# 147920]	MRD37 (MIM #616364)	Glycine encephalopathy [MIM# 605899]	MRXS13 [MIM# 300055]	MRXSC [MIM# 300534]	47 XYY
Inheritance	-	AD	AD	X-linked	AD	AD	AR	X-linked	X-linked	-
Growth	Short stature	-	+	+	+		-	-	-	tall stature
Head and Neck	Head	brachycephaly	microcephaly	microcephaly	microcephaly	microcephaly	-	microcephaly	microcephaly, macrocephaly	above-average head circumference
	Face	midface hypoplasia	-	oval face, long philtrum, micrognathia	trapezoid philtrum		-	micrognathia, facial hypotonia	small forehead, prognathism, micrognathia, maxillary hypoplasia, facial hypotonia, flat philtrum	mild flat malar region
		broad face	-	-	-		-	-	-
	Large ears	-	cupped ears, upturned lobules	+	+, posteriorly rotated ears, preauricular pit		-	+	+, raised earlobes	low set ears
	Hearing loss	+	-	+	+		-	-	-	-
	Hypertelorism	-	+	+	-		-	-	-	+
	Strabismus	-	+	+	-		-	-	+	-
	Eyes	-	iris coloboma, ptosis, deep-set eyes, downslanting palpebral fissures, broad eyebrows, medially flared eybrows	large eyes, epicanthal folds, optic nerve hypoplasia, optic disc pallor, nystagmus	long palpebral fissures, eversion of lateral third of lower eyelids, thick eyelashes, ptosis, blue sclerae, broad arched eyebrows, sparse eyebrows		-	-	small eyelashes, small, deep-set eyes, upslanting palpebral fissures, hypermetropia, myopia	-
	Broad nasal bridge	+	+	+	-		-	-	-	+
	Nose	-	prominent nasal tip, columella extends below the ala nasi	broad nasal tip, small nose	depressed nasal tip, short nasal columella		-	-	-	-
	Palate	-	submucous cleft palate	high-arched palate	c\left palate, high-arched palate		-	high-arched palate	high-arched palate	-
Cardiovascular	Congenital heart defect	+	+	-	+		-	-	-	-
Chest		-	pectus excavatum, pectus carinatum, accessory nipple	-	-		-	-	Pectus excavatum	-
Abdomen		-	abdominal distention, constipation, megacolon, vomiting	-	feeding difficulties, malabsorption, intestinal malrotation, anal stenosis or imperforate anus		-	-	-	-
Genitourinary	Structural renal anomalies	+	-	-	+		-	-	-	-
	Genital abnormalities	-	+	-	+		-	-	+	overvirilization, male infertility, normal to atrophic testicles, oligospermia
Skin		-	-	-	café au lait spots		-	-	-	-
Skeletal	Spine	scoliosis	-	+	+, vertebral anomalies		-	-	-	-
	Hands	Brachydactyly	-	-	short fifth finger, persistence of fingerpads		-	-	short distal phalanges, thick distal phalanges, brachydactyly, large hands	-
	Joints and lower limbs	-	-	-	congenital hip dislocation, joint hyperextensibility		-	pes cavus	small feet, talipes calcaneus, club feet	-
Neurologic	Intellectual disability	+	+	+	+	+	+	+	+	+
	Developmental delay	+	+	+	+	+	+	+	+	+
	Speech delay	+	+	+	-		+	+	+	+
	Seizures/ EEG abnormality	-	+	+/-	+	+	+, burst suppression pattern on EEG	EEG abnormalities	+	+
	Structural brain abnormalities	+	corpus callosum agenesis/hypoplasia	pontocerebellar hypoplasia	-		corpus callosum agenesis	-	-	megalencephaly, frontonasal meningoencephalocele, ventricular enlargement, agenesis, and/or hypoplasia of the callosal body, abnormal pattern of cerebral cortical convolutions, cortical dysplasia, disturbance of migration and posterior fossa malformation
	Tone	hypotonia	hypotonia	hypotonia / spasticity	hypotonia		hypotonia	spasticity	spasticity	impaired fine and gross motor function, coordination, and tone
	Deep tendon reflexes	decreased/absent	-	hyperreflexia	-		hyporeflexia to hyporeflexia	-	hyperreflexia	-
	Other	hoarse voice, decreased pain sensitivity	-	-	-		myoclonic jerks	ataxia, tremor, shuffling gait	shuffling gait	-
	Behavioral/ Psychiatric Manifestations	sleep disturbance, hyperactivity, polyembolokoilamania, self-destructive behavior, onychotillomania, head-banging	happy demeanor, repetitive behaviors, oral behaviors	-	-		-	psychosis, mood instability, schizophrenic symptoms	aggressive behavior, restlessness	impaired cognitive ability and verbal memory, and increased risk for hyperactivity and attention problems
Endocrine features		-	-	-	congenital hypothyroidism, premature thelarche		-	-	-	-
Hematology		-	-	-	idiopathic thrombocytopenic purpura, hemolytic anemia		-	-	-	-
Laboratory abnormalities		-	-	-	-		hyperglycinemia, elevated CSF/plasma glycine ratio	-	-	-
Molecular basis		interstitial deletion of 17p11.2, RAI1 (primary causes)	ZEB2	CASK	KMT2D (primary gene)	POGZ	GLDC	MECP2	KDM5C	extra copy of the Y chromosome

## Sheet: Table S5new
Supplementary Table S5: pathogenic variants identified in KMT2D in this report (bold, patient BAB2319) and in literature (references below)
D32E
S59RfsX86
S116P
C158VfsX50
C197Afs*11
T209I
Q211X
Y223X
E233X
P235QfsX26
P235PfsX26
L241CfsX260
L260fs
K287Ifs*6
H313fs
A319fs
S337L
E338*
L345LfsX18
L434QfsX496
P443HfsX487
L449VfsX5
L483FfsX17
S495RfsX434
P502SfsX7
P506TfsX2
S543L
L545RfsX
E641X
P647Q
P658fs
P692T
D704TfsX226
E758SfsX171
R845_P864del
E853PfsX3
Y959*
P998PfsX70
P998A
L1032Rfs24X
P1054HfsX10
P1054Hfs1063X
S1107QfsX8
L1118LfsX45
P1131L
T1175I
Q1178X
P1191L
V1192M
P1196TfsX11
V1244SfsX86
R1252X
R1258Q
E1297VfsX33
G1320X
V1340fs
V1341LfsX35
C1370X
M1379VfsX52
C1380R
G1387D
R1388L
R1388Pfs*30
A1390Gfs*40
Q1391X
E1391K
Y1407VfsX9
M1417V
L1418M
C1424F
I1428T
C1430R
E1431_C1433del
H1453R
K1466Qfs25X
C1471Y
C1471R
W1473X
S1476C
P1485LfsX21
T1506S
Q1522R
S1555F
V1561RfsX11
R1615X
S1632X
D1633AfsX86
E1654X
F1667X
R1687TfsX3
T1708TfsX25
K1712Rfs*22
A1718V
E1738X
E1742D
K1753Afs*34
R1757AfsX31
R1757X
R1796W
T1843NfsX4
E1862SfsX14
D1876GfsX37
K1885Qfs*18
Q1892X
R1903X
L1926SfsX31
E1927Kfs120X
Y1944X
Q1949X
L1953WfsX94
R1956PfsX92
E1965GfsX88
S1971TfsX76
T1985KfsX62
Y1998C
Q2004X
Q2044*
R2050KfsX6
R2099X
A2112HfsX32
T2195PfsX69
Y2199IfsX65
Y2199Ifs*65
Y2199llefs*
G2213AfsX50
G2213D
F2244Ifs*11
K2246NfsX18
G2265EfsX21
P2271S
P2324T
D2325X
L2331*
R2410X
R2410*
Q2416X
S2431VfsX3
E2433Kfs*52
S2438Ifs*11
R2460C
F2494Sfs*49
A2496SfsX10
P2550Rfs2604X
V2551SfsX32
P2557L
S2608PfsX83
L2610P
R2635X
R2635Q
R2645X
E2646X
E2678*
R2687X
E2703X
W2720X
S2733VfsX24
R2734X
G2758AfsX29
D2769EfsX1
R2771X
Q2811X
Q2811NfsX41
2820X
R2830X
P2841T
L2880P
E2881DfsX35
G2889X
Y2907X
S2910RfsX32
H2914Pfs*6
R2915X
K2953NfsX51
K2985SfsX19
P3055LfsX16
Q3068GfsX3
S3075FfsX3
E3110PfsX9
L3154X
D3165VfsX32
H3194PfsX3
E3250EfsX43
Q3269X
Q3282dup
R3321X
S3372CfsX16
Q3379X
M3398V
E3418X
D3419G
I3435fs
L3457fs
P3466LfsX36
3466fs
G3500V
V3534QfsX11
R3536AfsX122
Q3580X
Q3584X
M3592Hfs*83
S3614X
R3656C
Q3683X
A3689VfsX56
P3701LfsX47
R3707X
Q3717X
Q3757X
Q3764*
Q3812X
G3819Afs*11
E3833GfsX48
Q3839Pfs
Q3839X
Q3843X
L3876R
L3880M
Q3892X
L3897S
Q3902X
Q3903X
Q3905dup
E3908X
Q3915*
Q3922X
Q3932SfsX46
Q3932E
K3940_Q3945dup
Q3941X
Q3945X
L3948_Q3953del
Q3950R
Q3952_Q3958dup
Q3957X
Q3963X
Q3971X
E3982X
Q3988X
Q4013X
K4024E
Q4026X
P4055EfsX6
T4060NfsX4
P4067S
Q4081X
Q4092X
V4139Cfs*29
S4147X
R4162Q
P4163L
Q4171*
R4198X
R4198*
P4216LfsX62
Q4230X
Q4233X
Q4235X
L4253PfsX80
Q4270*
Q4275*
R4282X
R4319X
Q4322X
Q4322HfsX62
P4324TfsX10
P4353L
T4368NfsX3
W4377LfsX33
Q4387*
Q4401X
Q4401*
P4419L
R4420Q
A4428SfsX59
Q4429X
Q4464X
E4484X
R4484*
R4484X
Q4503X
K4527X
R4536X
K4556X
T4629HfX18
P4632HfsX8
Q4636X
R4659P
E4712fs
V4799M
A4802QfsX6
E4829QfsX8
P4865AfsX48
E4882PfsX36
Q4882PfsX36
R4904X
R4904*
L4921IfsX10
P4929fs
L4950PfsX9
R4960X
A4965T
W4982X
E5008X
E5011SfsX40
R5021X
E5027X
R5027X
D5028YfsX26
D5028E
R5030C
F5034V
P5046fs
A5047V
R5048C
R5048H
D5055_L5056dup
L5056P
H5059P
C5062Y
W5065X
Q5073X
R5086X
C5092S
C5092Y
T5098P
C5109F
Y5113X
C5117X
F5126Lfs*12
F5149CfsX9
V5151Afs*12
R5154Q
H5176Afs*24
R5179H
R5179C
G5182fs
L5183P
I5188V
Y5206X
Y5210C
R5214H
R5214C
W5217R
N5316Kfs*29
R5340L
E5340X
R5340Q
T5367TfsX90
Q5379X
S5386FfsX72
A5401GfsX56
E5425K
G5428D
R5432W
R5432Q
R5432X
N5437S
R5448X
R5454X
N5457NfsX2
T5464M
R5471T
R5471M
N5480TfsX7
N5480VfsX6
C5481Y
K5490RfsX21
I5497del
S5498F
R5500W
R5501X
Y5510D
Y14004X
References:
Banka et al., 2012
Cheon et al., 2014
Dentici et al.,2014
Hannibal et al., 2011
Kim et al., 2013
Li et al., 2011
Li et al., 2015
Liu et al., 2015
Makrythanasis et al., 2013
Micale et al., 2011
Micale et al., 2014
Morgan et al., 2015
Ng et al., 2010
Paulussen et al., 2011
Ratbi et al., 2013
Subbarayan et al., 2013

## Sheet: Table S6new
Supplementary Table S6: pathogenic variants identified in MECP2 in this report (bold, patient BAB2552) and in literature (references below)
E137G
A140V
R167W
P225L
K284E
P389Xfs
P399L
Q406X
R453Q
References:
Couvert et al., 2001
Gomot et al. 2003
Klauck et al. 2002
Meloni et al. 2000
Moog et al., 2003
Orrico et al. 2000
Winnepenninckx et al. 2002

## Sheet: Table S7new
Supplementary Table S7: pathogenic variants identified in CASK in this report (bold, patient BAB2540) and in literature (references below)
R27X
R28L
E76VfsX6
Y81X
R106X
S119Rfs7X
H120Pfs22X
K236Efs10X
Y268H
L354P
P396S
R489W
M501fs
C633fsX2
G637D
R639X
W656X
W657X
W680Cfs29X
W680Cfs3X
Q692X
Q694X
D710G
Y728C
E878X
W919R
References:
Burglen et al., 2012
Hackett et al., 2010
Hayashi et al., 2012
Jinnou et al., 2012
Moog et al., 2015
Najm et al.2008
Nakajiri et al., 2015
Nakamura et al., 2014
Piluso et al., 2009
Takanashi et al., 2012
Tarpey et al., 2009

## Sheet: Table S8new
Supplementary Table S8: pathogenic variants identified in GLDC in this report (bold, patient BAB4947) and in literature (references below)
M1T
L10fs
R59T
L82W
S132W
Y138F
N150T
E153X
Y161C
G171A
T187K
A202V
R212K
C225R
R236X
T269M
E270X
A283P
D295Y
L296R
A313P
P329T
A335fs
R337X
H371D
I372F
R373W
A389V
A392fs
R410K
R424X
L429fs
I440N
R461Q
P509A
R515S
T532R
N533Y
R536E
M552V
C558X
S564I
A569T
R596X
E597K
V611G
C644F
P647L
H651R
Q666X
A694P
P700A
S701F
V705M
H718fs
L726Q
G728R
A729fs
N732K
R739H
H753P
F756del
H760Q
G761R
G762R
P765S
G766C
P769L
G771R
H775R
R790W
A802V
W805X
S808fs
T830M
M840K
A841P
Y858X
D880V
Q886X
V905G
P949L
S957P
R966G
References:
Applegarth and Toone et al., 2004
Azize et al., 2014
Boneh et al., 2005
Brunel-Guitton et al., 2011
Chang et al., 2008
Conter et al., 2006
Finnish Disease Database
Korman et al., 2004
Korman et al., 2006
Kure et al., 2006
Love et al., 2014
Meyer et al., 2010
Toone et al.,2000
Toone et al.,2002

## Sheet: Table S9new
Supplementary Table S9: pathogenic variants identified in KDM5C in this report (bold, patient BAB2293) and in literature (references below)
R68fsX7
A77T
D87G
R332X
A388P
D402Y
S451R
E468fsX2
P480L
V504M
F642L
A683PfsX81
R694X
E698K
C724X
L731F
R750W
Y751C
R766W
K1023R
K1028X
K1087fsX43
W1288X
R1481fsX9
References:
Abidi et al., 2008
Adegbola et al., 2008
Brookes et al., 2015
Gonçalves et al., 2014
Iwase et al., 2007
Jensen et al., 2005
Rujirabanjerd et al., 2010
Santos et al., 2006
Santos-Rebouças et al., 2011
Tzschach et al., 2015

## Sheet: Table S10new
Supplementary Table S10: pathogenic variants identified in MAP2K2 in this report (bold, patient BAB2474) and in literature (references below)
F57C
F57V
D69del
N126D
P128Q
Y134H
References:
Karaer et al., 2015
Rauen et al., 2010
Rodriguez-Viciana et al., 2006
Schulz et al., 2008

[truncated: 4 more sheets: Table S11new, Table S12new, Table S13new, Table S14new]
